# Supplementary material
Source: ML conference proceedings conference paper supplement (https://openaccess.thecvf.com/content/CVPR2021/html/Kappel_High-Fidelity_Neural_Human_CVPR_2021_paper.html)
Supplement: Supplementary file 2 [file Kappel_High-Fidelity_Neural_Human_CVPR_2021_supplemental.zip]

Archive with 2 entries (2 files):
- 01640-supp.mp4
- 01640-supp.pdf
